# Supplementary material for: Genomic andin vitroproperties of the dairyStreptococcus thermophilusSMQ-301 strain against selected pathogens
Source: Royal Society of Chemistry journal article supplement (doi:10.1039/d0fo02951c), 2021-01-01
Supplement: d0fo02951c1.pdf [file d0fo02951c1.pdf]

1 Supplementary files

2 Table S1: Genes assigned for stress response system in *S. thermophilus* SMQ-301

| Encoded proteins                                                                                                                                 | Assigned genes                                                                                                                                                                                     |
|--------------------------------------------------------------------------------------------------------------------------------------------------|----------------------------------------------------------------------------------------------------------------------------------------------------------------------------------------------------|
| General stress regulator                                                                                                                         | SMQ301_RS08365                                                                                                                                                                                     |
| Universal stress protein UspA                                                                                                                    | SMQ301_RS07845                                                                                                                                                                                     |
| <b>Acid resistance</b>                                                                                                                           |                                                                                                                                                                                                    |
| <i>F0F1-ATPase system</i>                                                                                                                        |                                                                                                                                                                                                    |
| F0F1-ATPase synthase gene cluster                                                                                                                | SMQ301_RS02525<br>SMQ301_RS02530<br>SMQ301_RS02535<br>SMQ301_RS02540<br>SMQ301_RS02545<br>SMQ301_RS02550<br>SMQ301_RS02555<br>SMQ301_RS02560                                                       |
| <i>Urease</i>                                                                                                                                    |                                                                                                                                                                                                    |
| Urease gene cluster                                                                                                                              | SMQ301_RS01350<br>SMQ301_RS09900<br>SMQ301_RS08175<br>SMQ301_RS01590<br>SMQ301_RS01595<br>SMQ301_RS01600<br>SMQ301_RS01605<br>SMQ301_RS01610<br>SMQ301_RS01615<br>SMQ301_RS01620<br>SMQ301_RS02605 |
| Ammonia permease                                                                                                                                 |                                                                                                                                                                                                    |
| <b>Cold and heat response</b>                                                                                                                    |                                                                                                                                                                                                    |
| Heat shock protein GrpE<br>(conserved chaperone complexes: GrpE-DnaK-DnaJ)                                                                       | SMQ301_RS00785<br>SMQ301_RS00790<br>SMQ301_RS00795                                                                                                                                                 |
| Heat shock protein Hsp33<br>Molecular chaperone GroES-GroEL                                                                                      | SMQ301_RS01135<br>SMQ301_RS01240<br>SMQ301_RS01245                                                                                                                                                 |
| Heat shock protein HtpX<br>Molecular chaperone GroES<br>CtsR family transcriptional regulator of class III stress genes<br>(heat shock response) | SMQ301_RS03715<br>SMQ301_RS04675                                                                                                                                                                   |
| ATP-dependent Clp protease ATP-binding subunit                                                                                                   | SMQ301_RS00545<br>SMQ301_RS00050 SMQ301_RS03050<br>SMQ301_RS03175 SMQ301_RS07740<br>SMQ301_RS01940                                                                                                 |
| ATP-dependent Clp protease proteolytic subunit<br>Cold-shock protein                                                                             | SMQ301_RS04365 SMQ301_RS04370                                                                                                                                                                      |
| Salt resistance                                                                                                                                  |                                                                                                                                                                                                    |
| Sodium transporter                                                                                                                               | SMQ301_RS06655                                                                                                                                                                                     |
| Cation transporter                                                                                                                               | SMQ301_RS04495 SMQ301_RS04665<br>SMQ301_RS05145                                                                                                                                                    |
| <b>Oxidative stress response</b>                                                                                                                 |                                                                                                                                                                                                    |
| Glutamate-cysteine ligase                                                                                                                        | SMQ301_RS06775                                                                                                                                                                                     |
| Glutathione reductase                                                                                                                            | SMQ301_RS02205                                                                                                                                                                                     |
| Thioredoxin                                                                                                                                      | SMQ301_RS00025 SMQ301_RS08680                                                                                                                                                                      |

---

|                                              |                       |
|----------------------------------------------|-----------------------|
|                                              | <i>SMQ301_RS08905</i> |
|                                              | <i>SMQ301_RS07910</i> |
| Thioredoxin reductase                        | <i>SMQ301_RS06220</i> |
| NADH oxidase                                 | <i>SMQ301_RS08995</i> |
| Superoxide dismutase                         | <i>SMQ301_RS06495</i> |
| Peptide methionine sulfoxide reductase Msr B | <i>SMQ301_RS07820</i> |
| Methionine sulfoxide reductase A             | <i>SMQ301_RS05030</i> |
| Peroxidase                                   |                       |

---

- 3
- 4
- 5
- 6
- 7
- 8
- 9
- 10
- 11
- 12
- 13
- 14
- 15
- 16
- 17
- 18
- 19
- 20
- 21
- 22
- 23
- 24
- 25
- 26
- 27
- 28
- 29
- 30
- 31
- 32
- 33
- 34

35 Table S2: Gene table for bacteriocin area of interest for *S. thermophilus* SMQ-301

| Name     | Function                                                                                                                                                                                     |
|----------|----------------------------------------------------------------------------------------------------------------------------------------------------------------------------------------------|
| LanK     | Sensor histidine kinase spaK<br>Methylenetetrahydrofolate--tRNA-(uracil-5-)-methyltransferase TrmFO OS=Streptococcus thermophilus (strain ATCC BAA-491 / LMD-9) OX=322159 GN=trmFO PE=3 SV=1 |
| orf00002 | Uncharacterized protein YxjG OS=Bacillus subtilis (strain 168) OX=224308 GN=yxjG PE=4 SV=3                                                                                                   |
| orf00004 | Uncharacterized protein YxjH OS=Bacillus subtilis (strain 168) OX=224308 GN=yxjH PE=4 SV=4                                                                                                   |
| orf00007 | Nucleoside diphosphate kinase OS=Streptococcus thermophilus (strain CNRZ 1066) OX=299768 GN=ndk PE=3 SV=2                                                                                    |
| orf00010 | Sulfurtransferase Alvin_2599 OS=Allochromatium vinosum (strain ATCC 17899 / DSM 180 / NBRC 103801 / NCIMB 10441 / D) OX=572477 GN=rhd_2599 PE=1 SV=1                                         |
| orf00011 | Diacetyl reductase [(S)-acetoin forming] OS=Staphylococcus aureus (strain COL) OX=93062 GN=butA PE=3 SV=1                                                                                    |
| orf00014 | Diacetyl reductase [(S)-acetoin forming] OS=Klebsiella pneumoniae OX=573 GN=budC PE=1 SV=2                                                                                                   |
| orf00017 | Elongation factor 4 OS=Streptococcus thermophilus (strain ATCC BAA-491 / LMD-9) OX=322159 GN=lepA PE=3 SV=1                                                                                  |
| orf00020 | HTH-type transcriptional regulator rgg OS=Streptococcus gordonii (strain Challis / ATCC 35105 / BCRC 15272 / CH1 / DL1 / V288) OX=467705 GN=rgg PE=4 SV=1                                    |
| orf00022 | Putative mycofactocin radical SAM maturase MftC OS=Mycobacterium tuberculosis (strain CDC 1551 / Oshkosh) OX=83331 GN=mftC PE=3 SV=1                                                         |
| BmbF     | Uncharacterized 32.2 kDa protein in hmfB 3'region OS=Methanothermus fervidus OX=2180 PE=3 SV=1                                                                                               |
| orf00030 | Acetolactate synthase OS=Bacillus subtilis (strain 168) OX=224308 GN=alsS PE=2 SV=3                                                                                                          |
| orf00032 | Alpha-acetolactate decarboxylase OS=Streptococcus thermophilus OX=1308 GN=aldC PE=1 SV=1                                                                                                     |
| orf00034 | ATP-dependent protease OS=Lactococcus lactis subsp. lactis OX=1360 PE=4 SV=1                                                                                                                 |
| orf00037 | Macrolide export ATP-binding/permease protein MacB OS=Bdellovibrio bacteriovorus (strain ATCC 15356 / DSM 50701 / NCIB 9529 / HD100) OX=264462 GN=macB PE=3 SV=1                             |
| ABC      | Probable oxidoreductase OS=Streptomyces lividans OX=1916 PE=3 SV=1                                                                                                                           |
| orf00047 | Uncharacterized HTH-type transcriptional regulator YxbF OS=Bacillus subtilis (strain 168) OX=224308 GN=yxbF PE=4 SV=1                                                                        |
| orf00050 |                                                                                                                                                                                              |

36

37
